# Supplementary material for: Highly dynamic inflammatory and excitability transcriptional profiles in hippocampal CA1 following status epilepticus
Source: PubMed Central journal article supplement (PMC10719343; doi:10.1038/s41598-023-49310-y), 2023-12-14
Supplement: 41598_2023_49310_MOESM4_ESM.pdf [file 41598_2023_49310_MOESM4_ESM.pdf]

Supplementary Figure 4

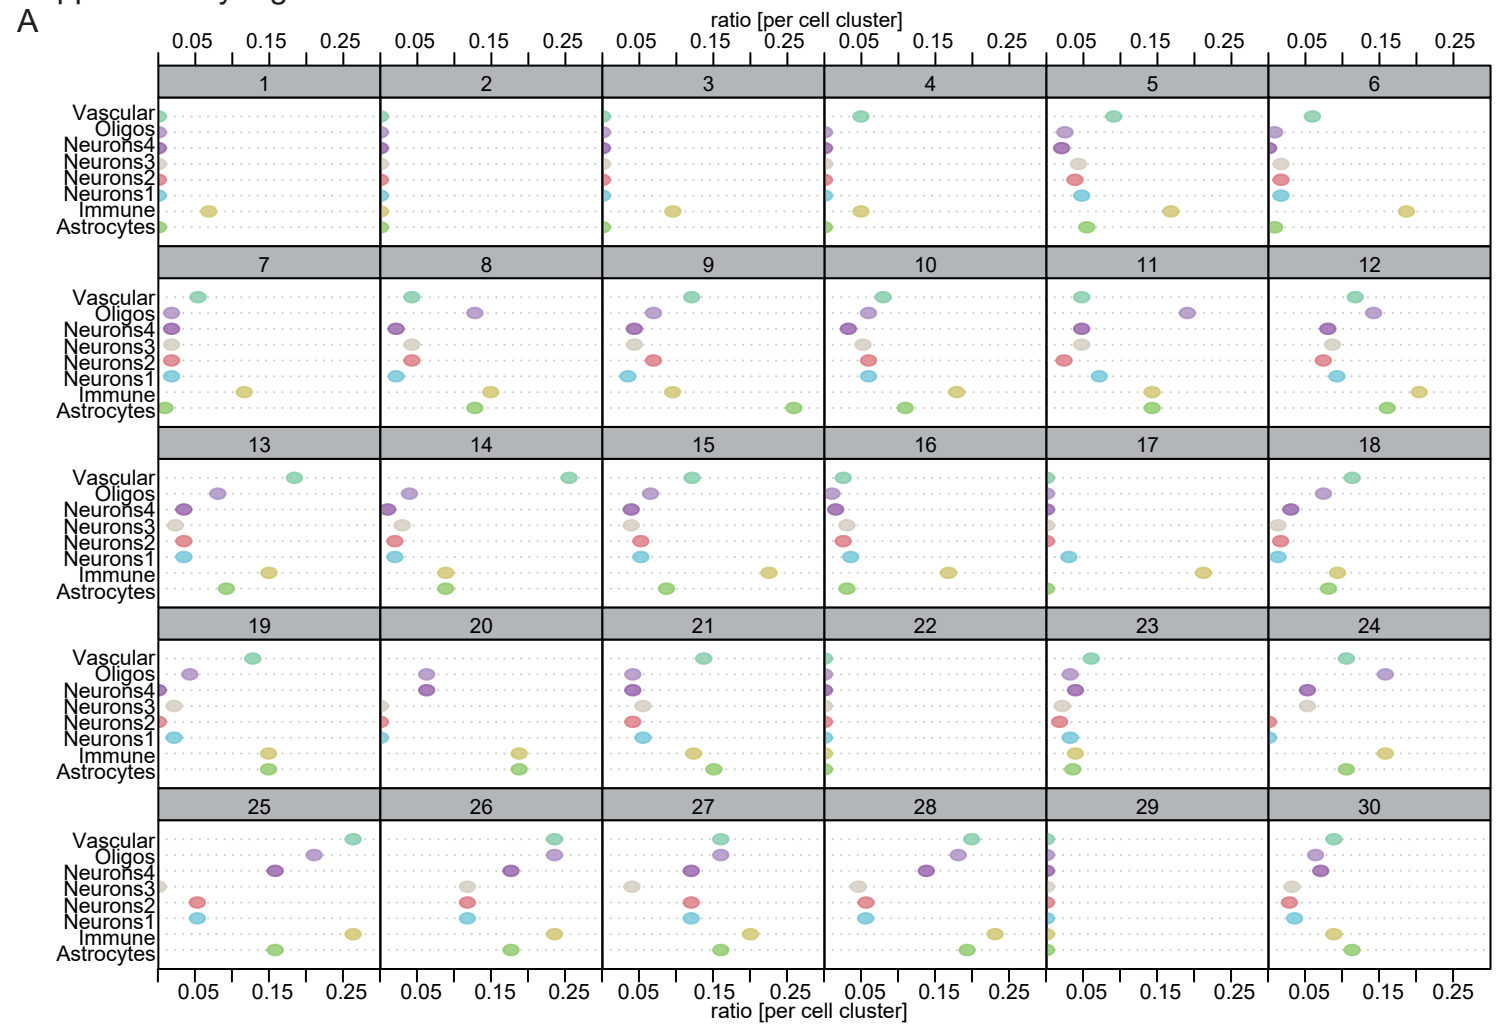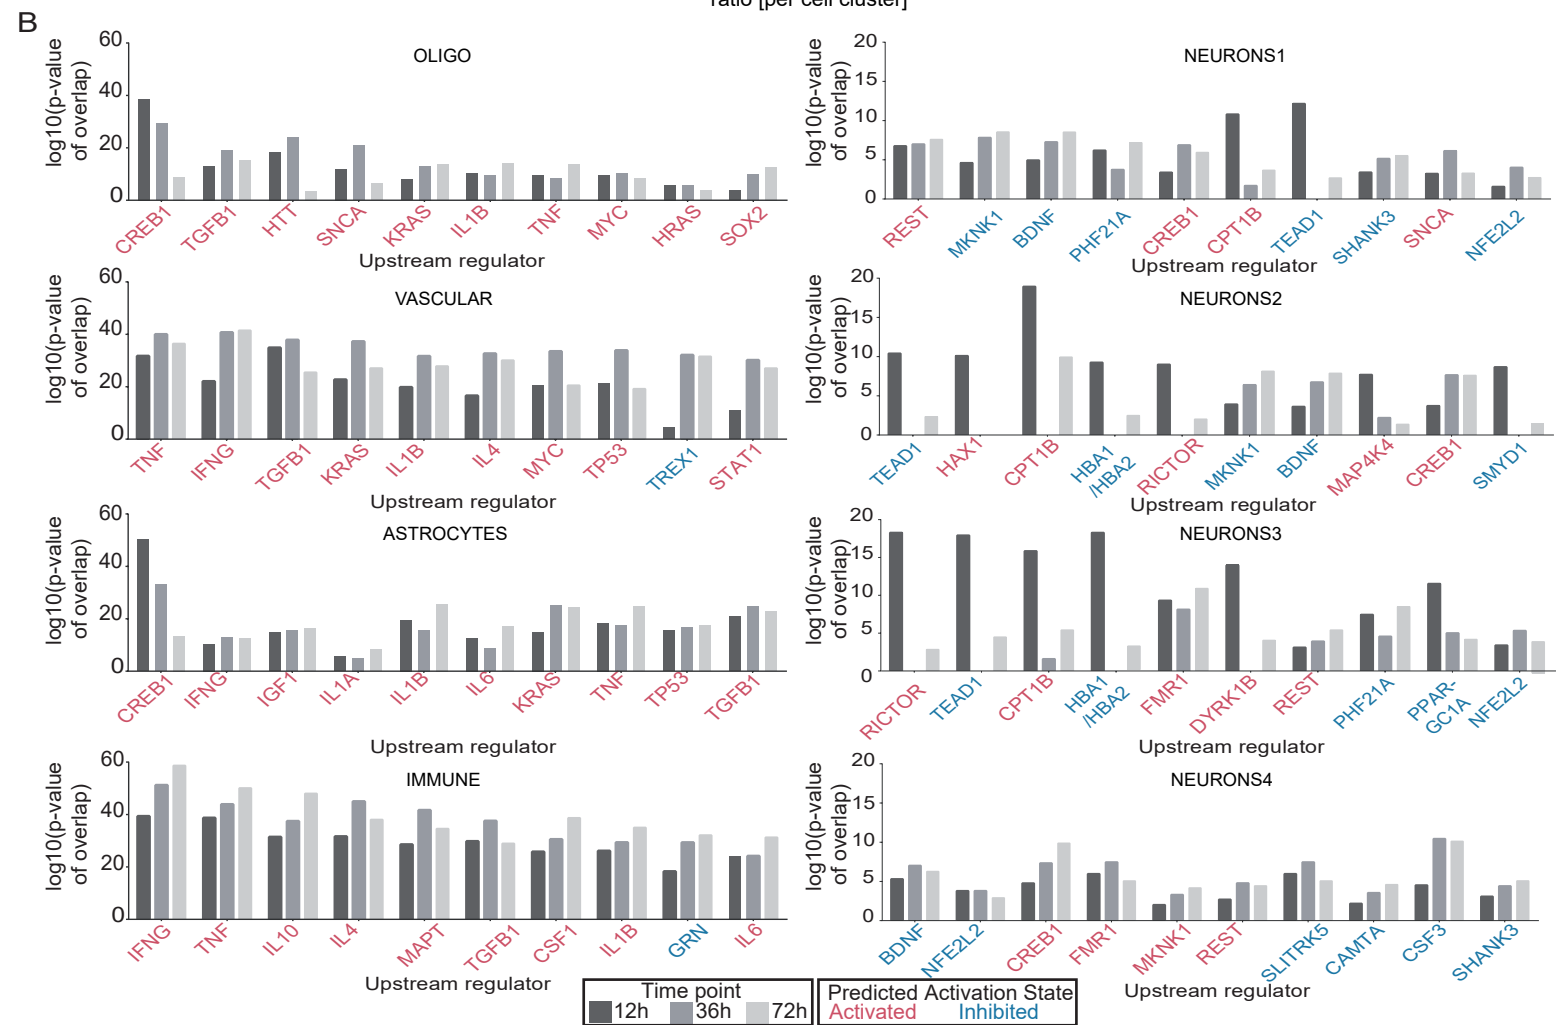

**Supplement Fig. 4. Clustering analysis and cell-type associated clusters reveal a predominant immune cell type population associated to specific upstream regulators (A)** BHC clustered genes were associated with specific CA1 cell types. The ratio represents the proportion of related cell type genes that are significant markers for each cluster ( $p < 0.05$ ). (B) Comparison of the most relevant upstream regulators for each cell populations at different time points. ( $p$ -value of overlap  $< 0.05$ )
